# Supplementary material for: Enhancer transcription identifies cis -regulatory elements for photoreceptor cell types
Source: Oxford University Press journal article supplement (doi:10.1242/dev.184432), 2020-01-08
Supplement: dev184432supp.pdf [file dev184432supp.pdf]

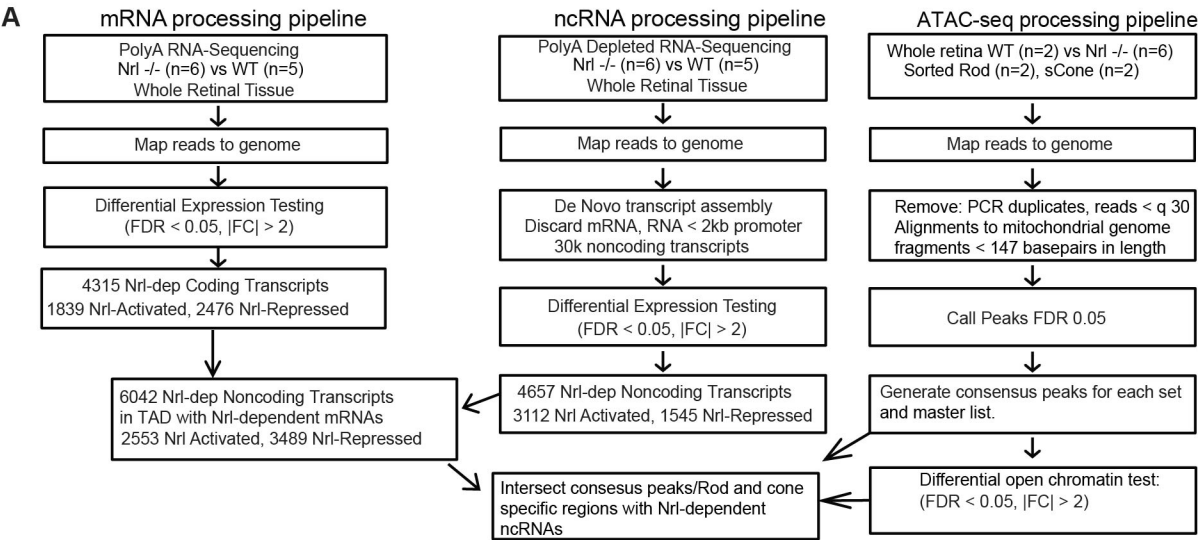

**Figure S1: Processing pipelines for mRNA-seq, ncRNA-seq and ATAC-seq**

A) Processing pipeline for ncRNA, mRNA, and ATAC-seq

A

| Rank | Motif                                                                             | P-value |                |
|------|-----------------------------------------------------------------------------------|---------|----------------|
| 1    |  | 1e-23   | Nrl, Mafa      |
| 2    |  | 1e-19   | Znf, CEBPG     |
| 3    |  | 1e-19   | Ifr, Hox       |
| 4    |  | 1e-18   | NR             |
| 5    |  | 1e-18   | Hox            |
| 6    |  | 1e-16   | Id4, Npas, Nkx |
| 7    |  | 1e-15   | CRX, OTX       |
| 8    |  | 1e-14   | E2Fn           |
| 9    |  | 1e-14   | MZF1, GCM2     |
| 10   |  | 1e-13   | Onecut1,2      |

**Figure S2: De novo motif analysis of putative promoter regions of ncRNA without ATAC-seq or ChIP peaks**

A) Top ten motifs (Homer) from de novo scan of 5' region of ncRNAs without an overlap with any ATAC-seq or ChIP-seq peaks. Best match transcription factor labeled.

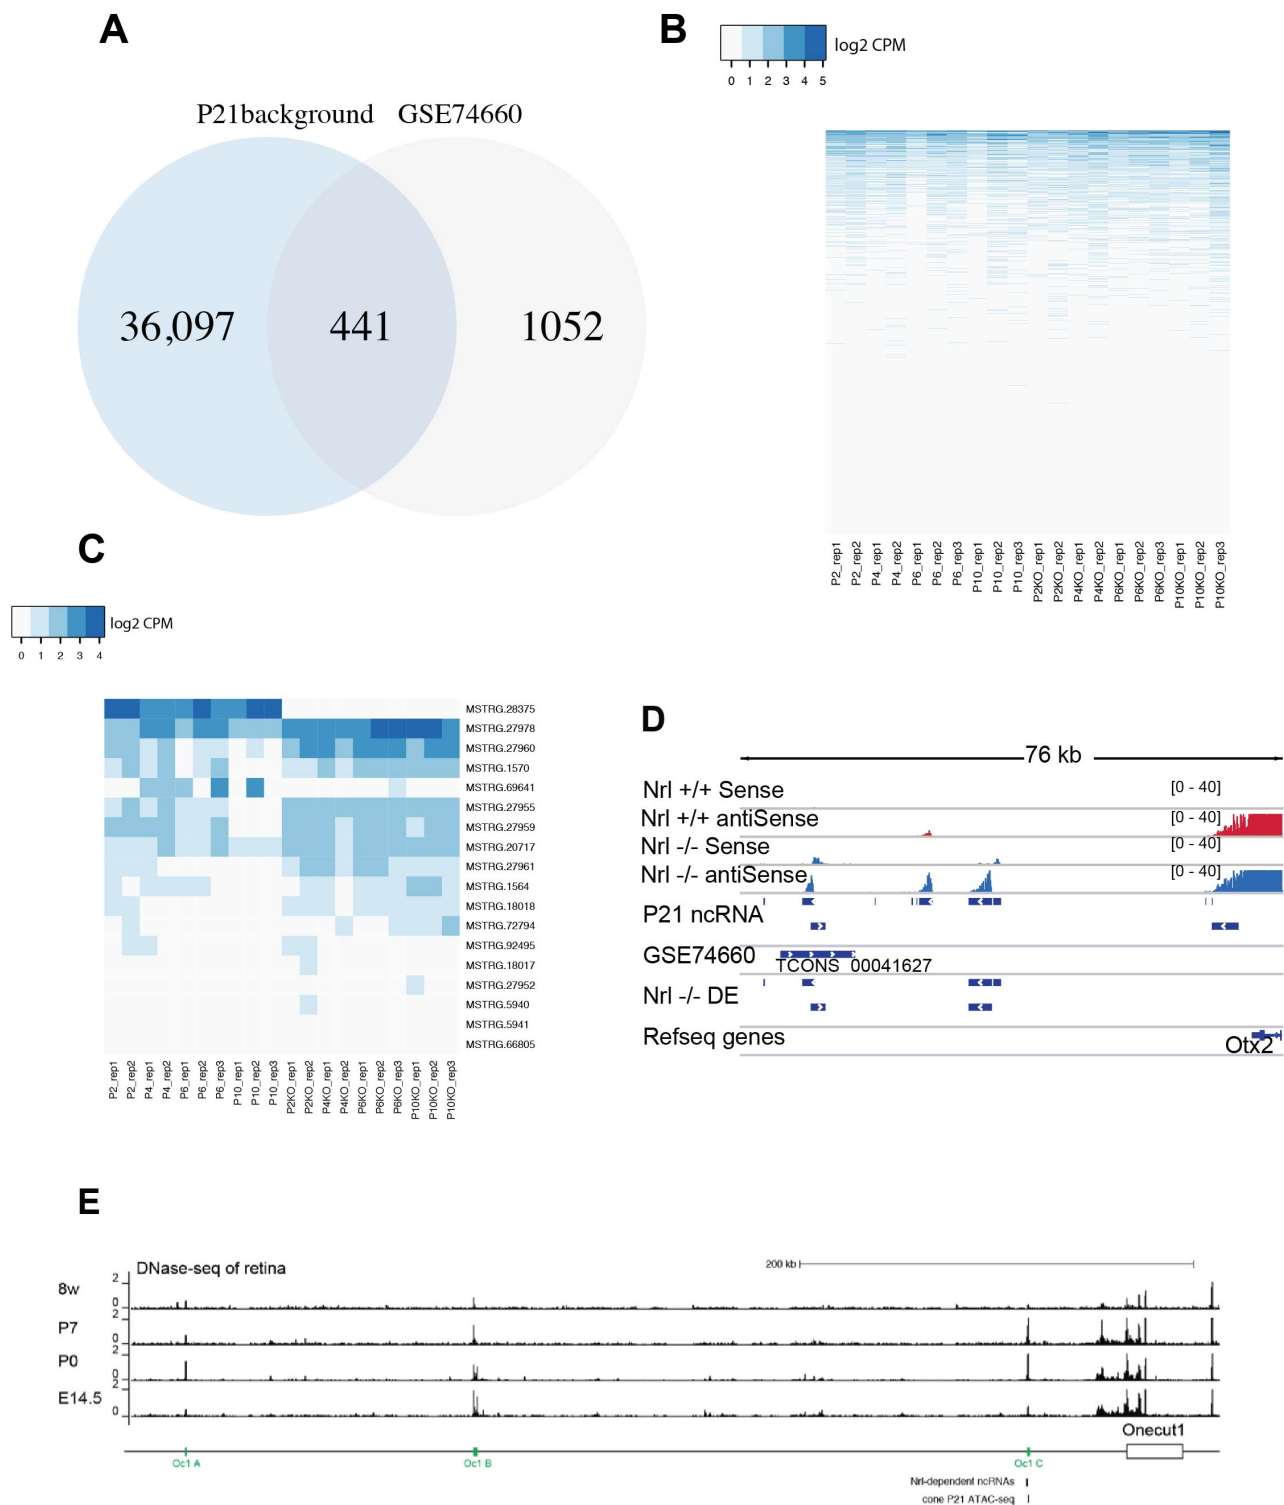

### Figure S3: ncRNAs show expression throughout development

- A) Venn diagram of poly-A depleted ncRNAs vs GSE74660 set of ncRNAs from total-RNA
- B) CPM heat map of all time-course experiments against poly-A depleted ncRNAs
- C) CPM heat map of all time-course experiments against in-vivo and ex-vivo tested enhancers
- D) Genome browser shot of *Otx2* locus showing ncRNA bigwigs for wild-type and *Nrt*<sup>-/-</sup> in both strands, GSE74660 RNA sites, and Differentially expressed ncRNAs.
- E) Annotation track shows ENCODE DNaseI Hypersensitivity Sites for mouse retinal cells at various stages of development for the *Oc1* locus. 3 peaks were selected for further testing (*Oc1* A-*Oc1* C) within a ~600kb region upstream of *Oc1*.

### **Table S1: De novo motif enrichment**

Top: Differential motif enrichment of ncRNA vs Open Chromatin with Six6 motif highlighted.

Middle: De novo motif enrichment analysis of DNase at day 7 (ENCFF040EOQ)

Bottom: De novo motif enrichment analysis of DNase at week 8 (ENCFF976MAY)

[Click here to Download Table S1](#)

### **Table S2: List of *Nrl*-dependent ncRNAs and corresponding genomic features**

[Click here to Download Table S2](#)
